# Supplementary material
Source: PubMed Central journal article supplement (PMC11027471)

Supplementary Fig. 1

a

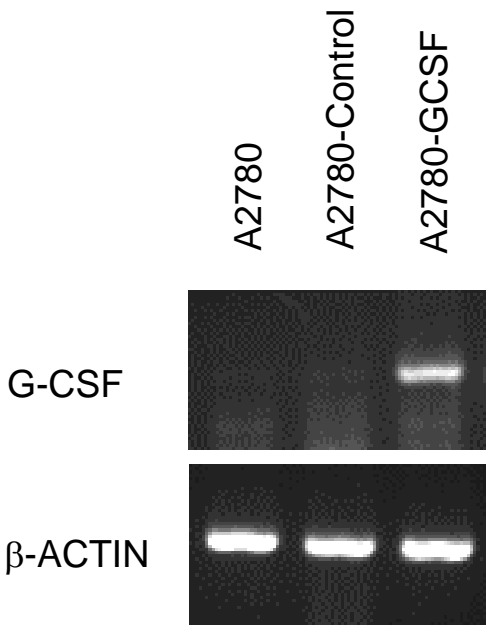

b

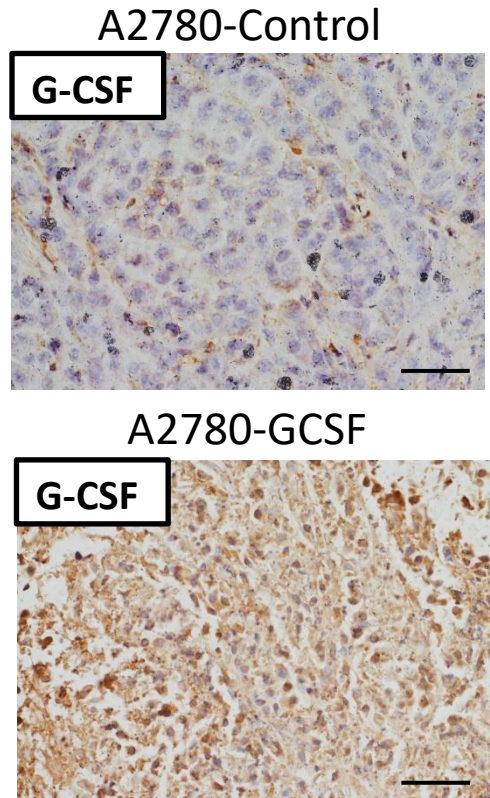

c

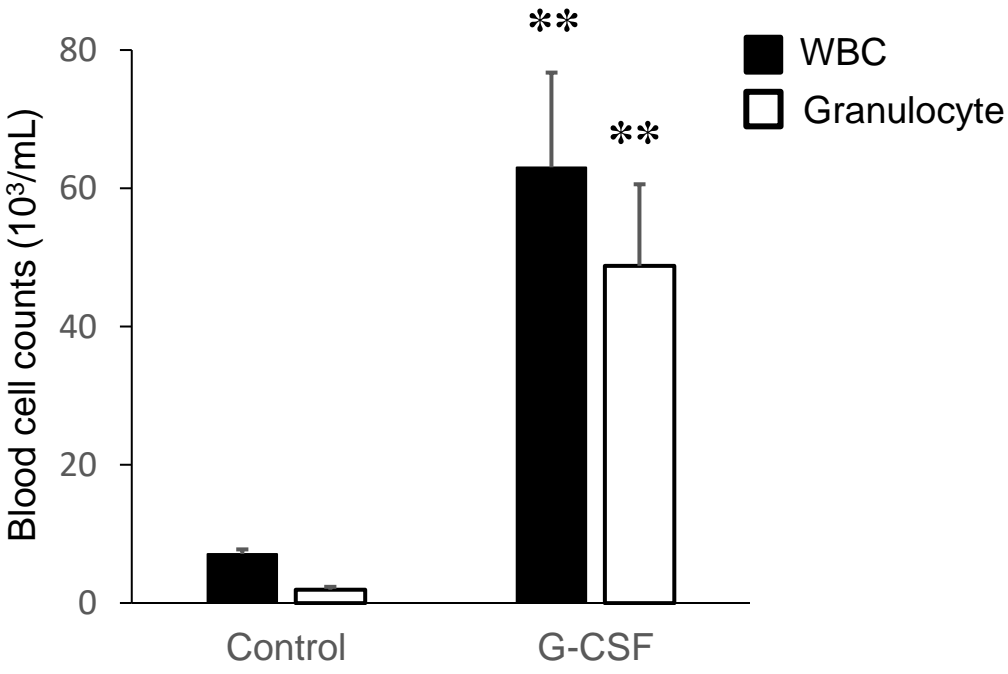

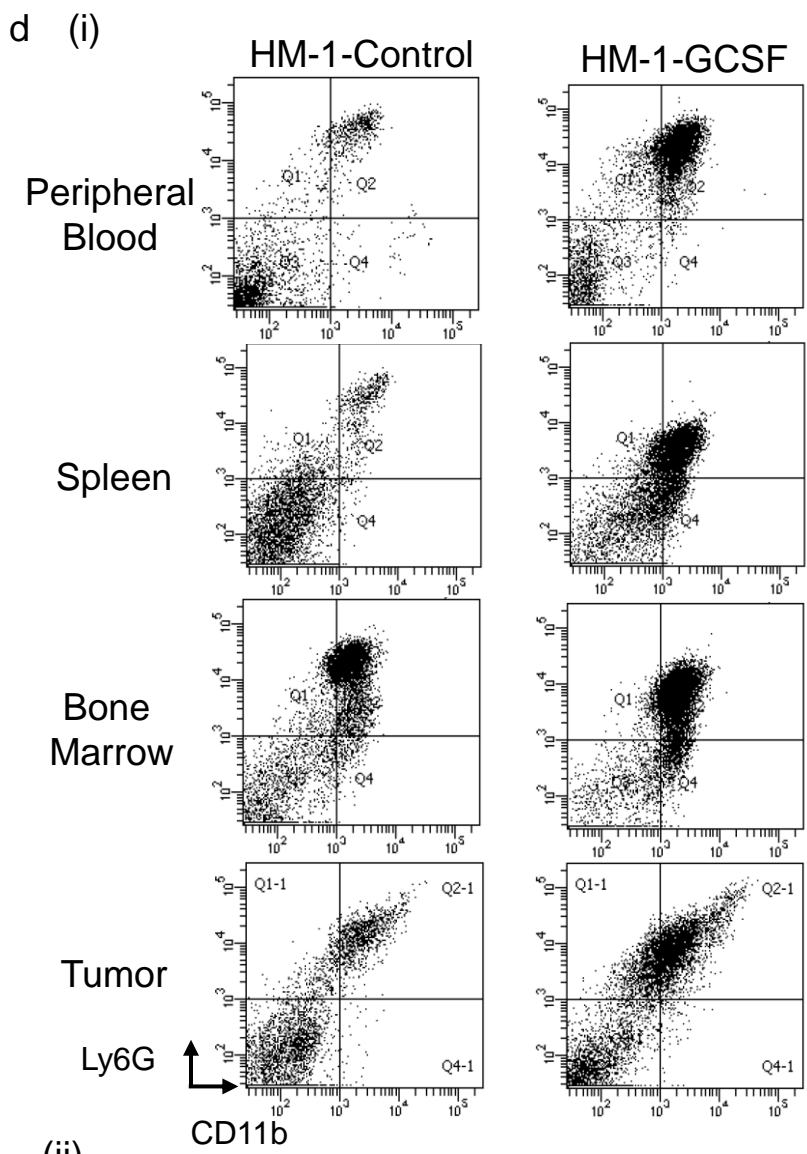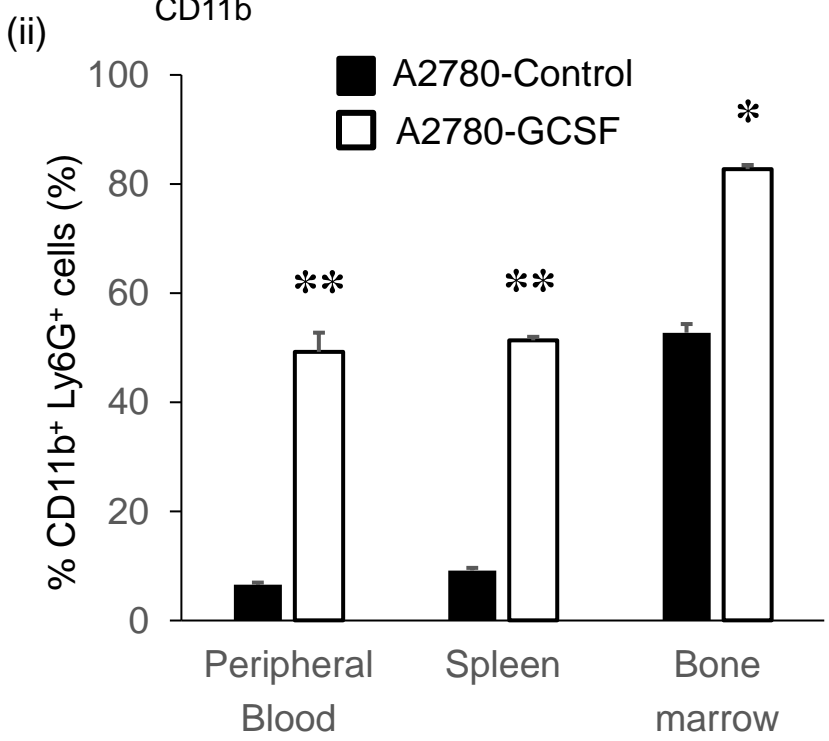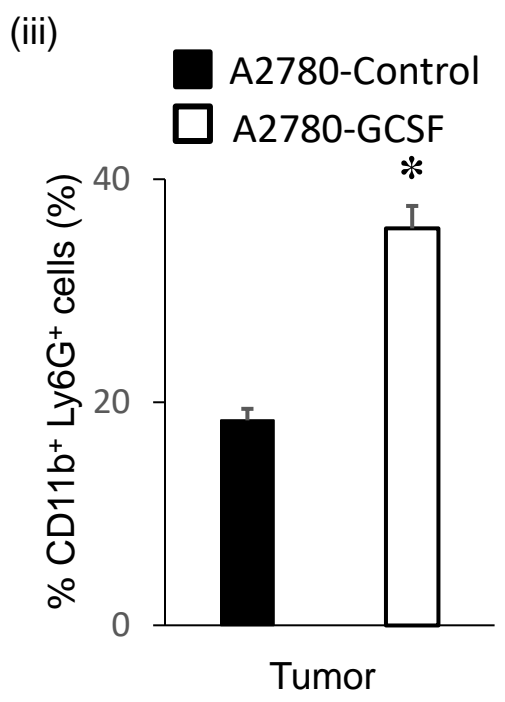

Supplementary Fig. 2

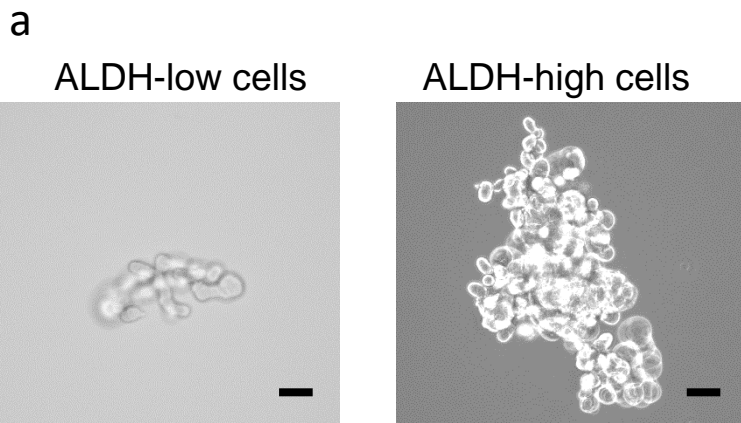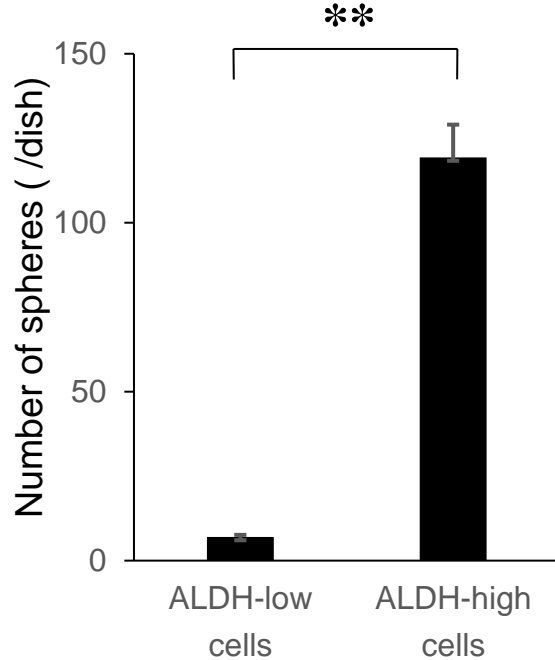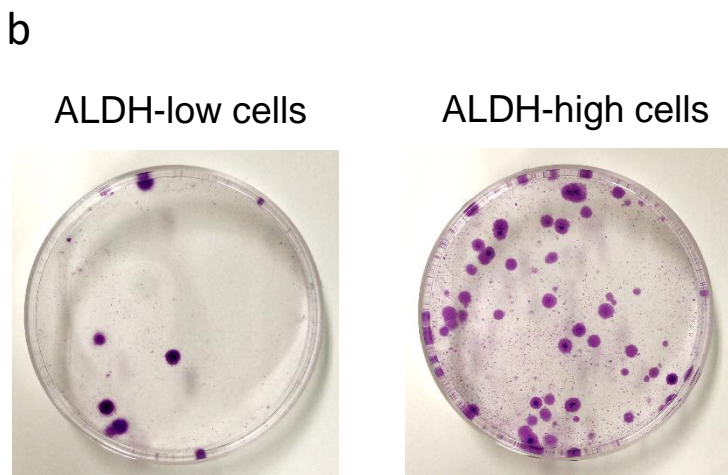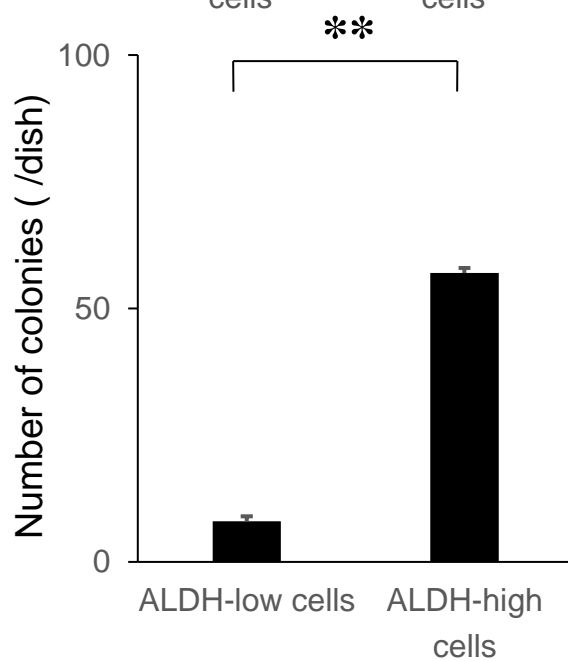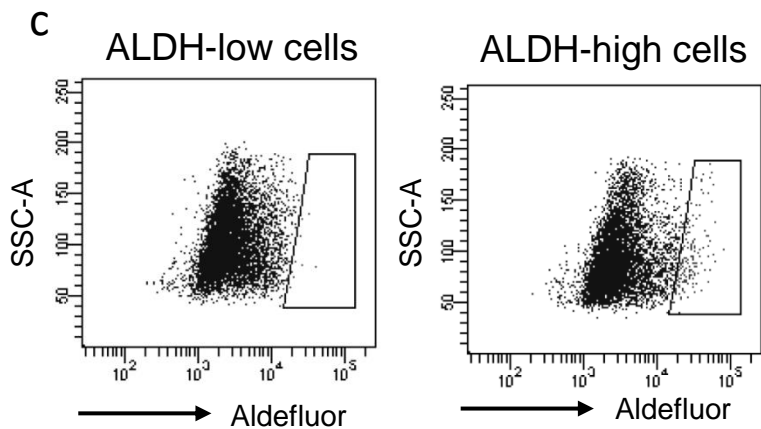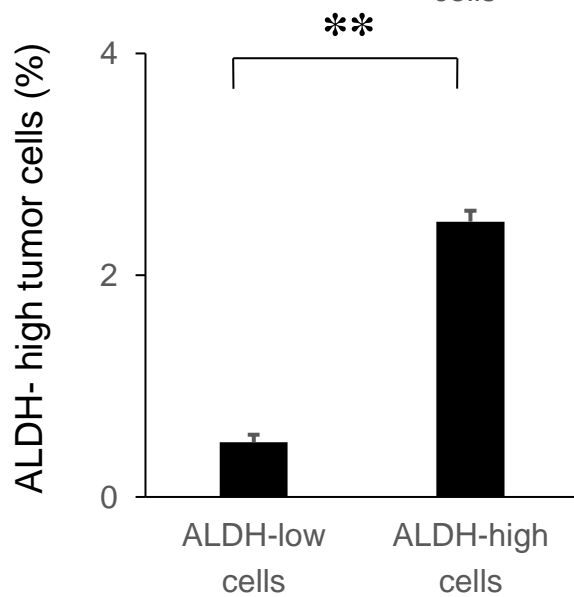

d

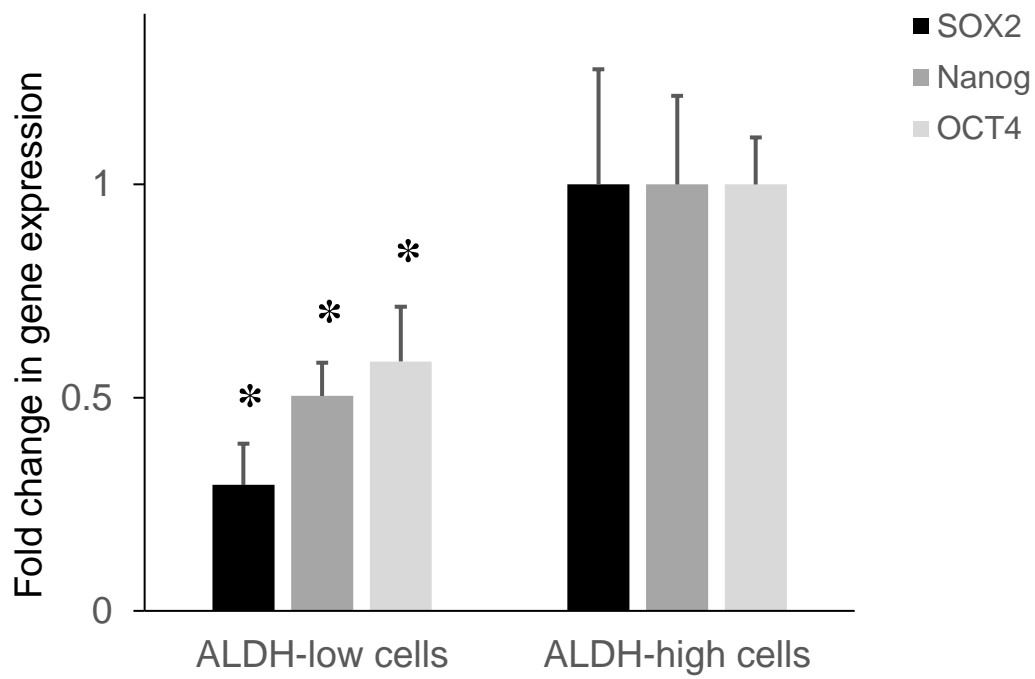

Supplementary Fig. 3

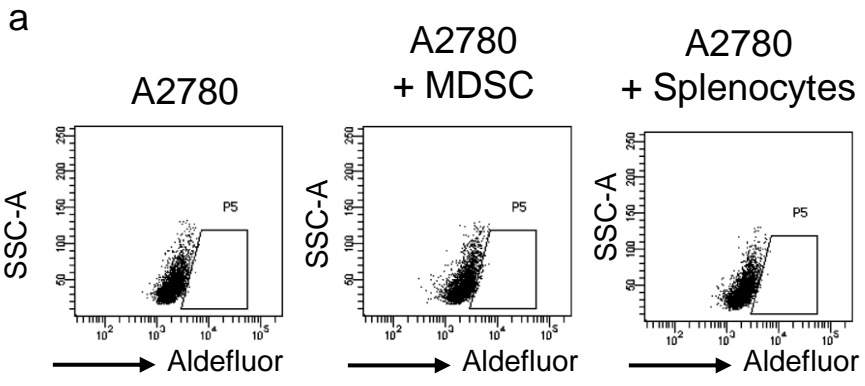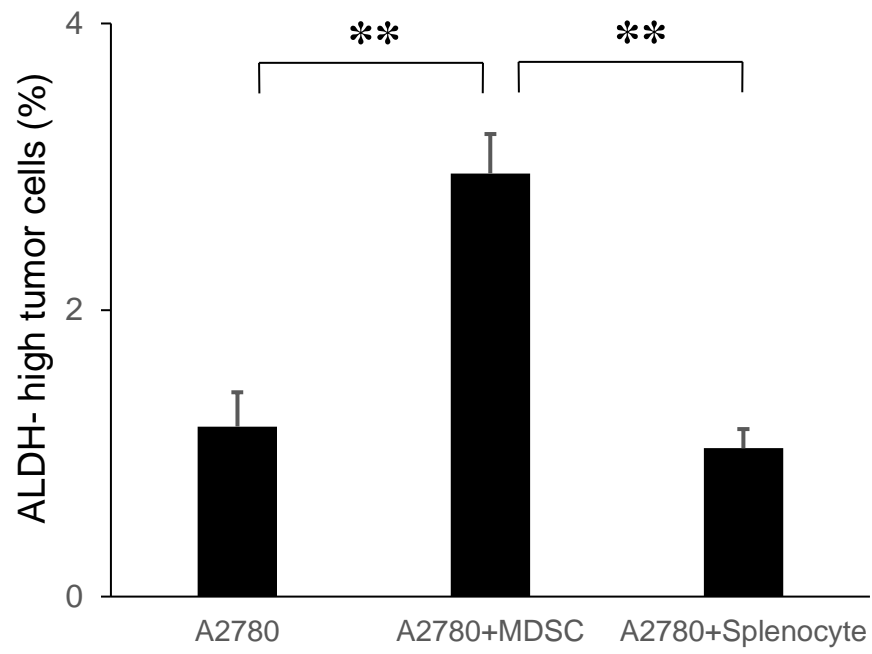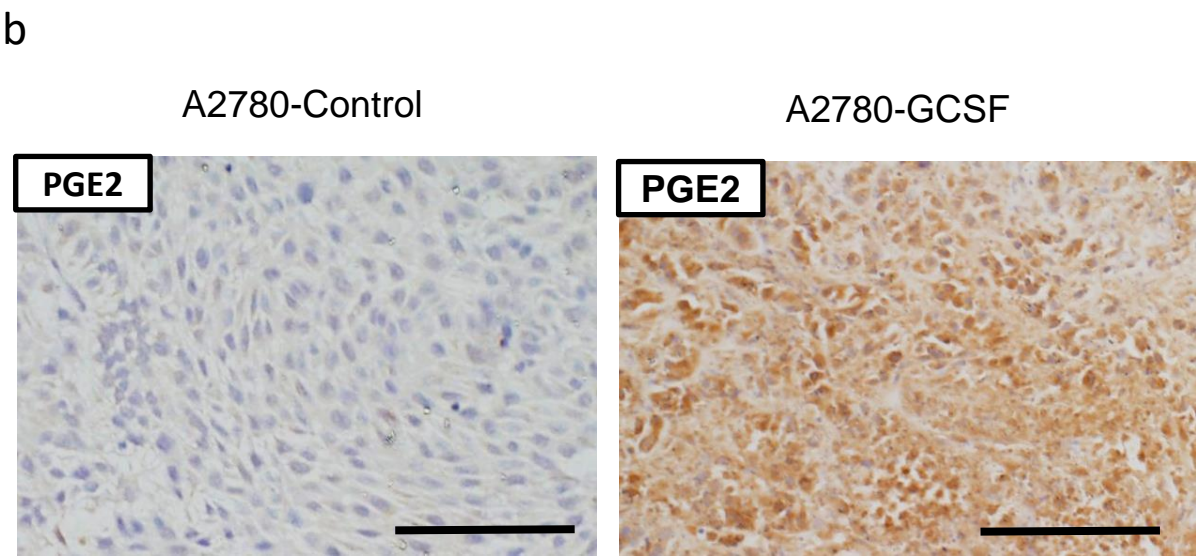

c

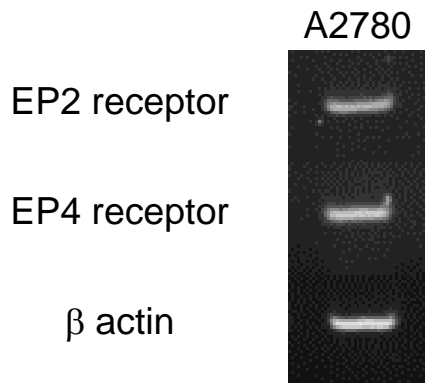

d

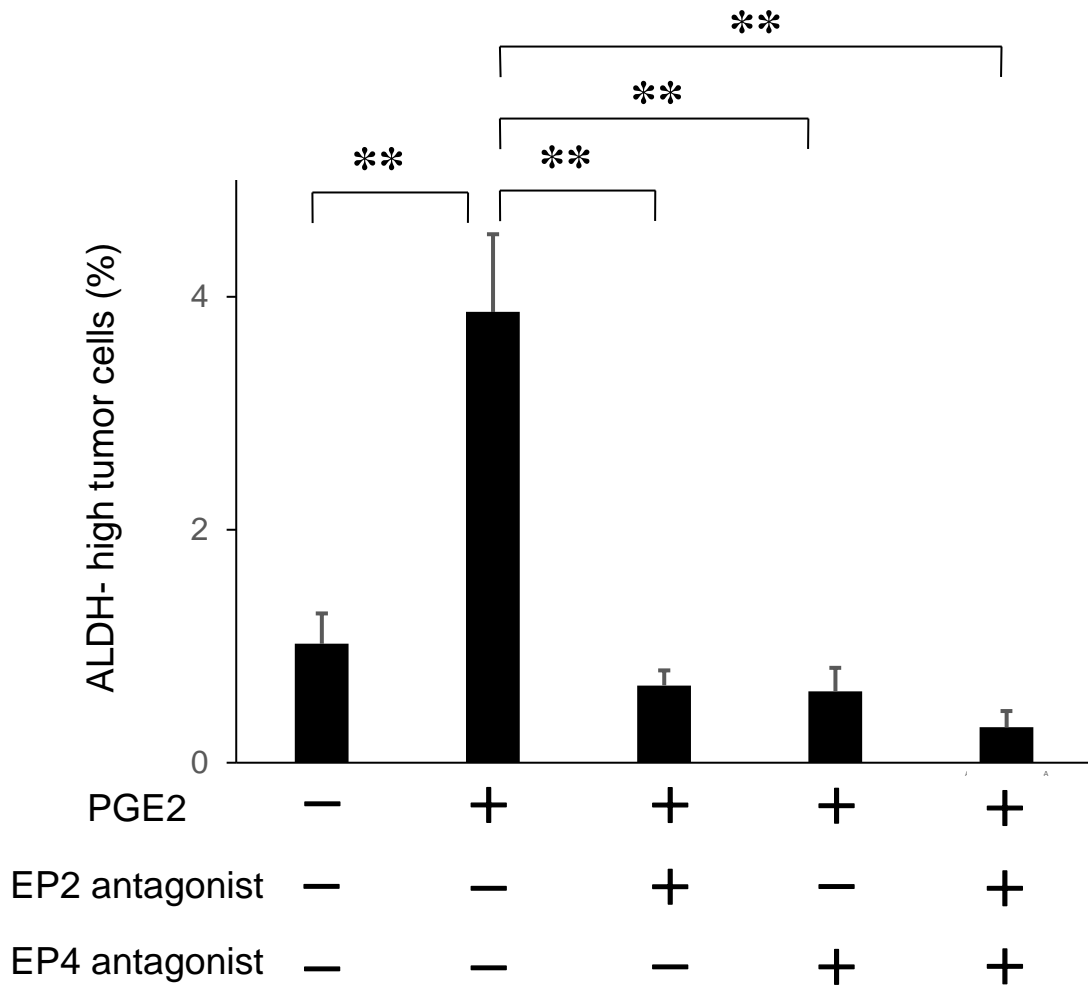

e

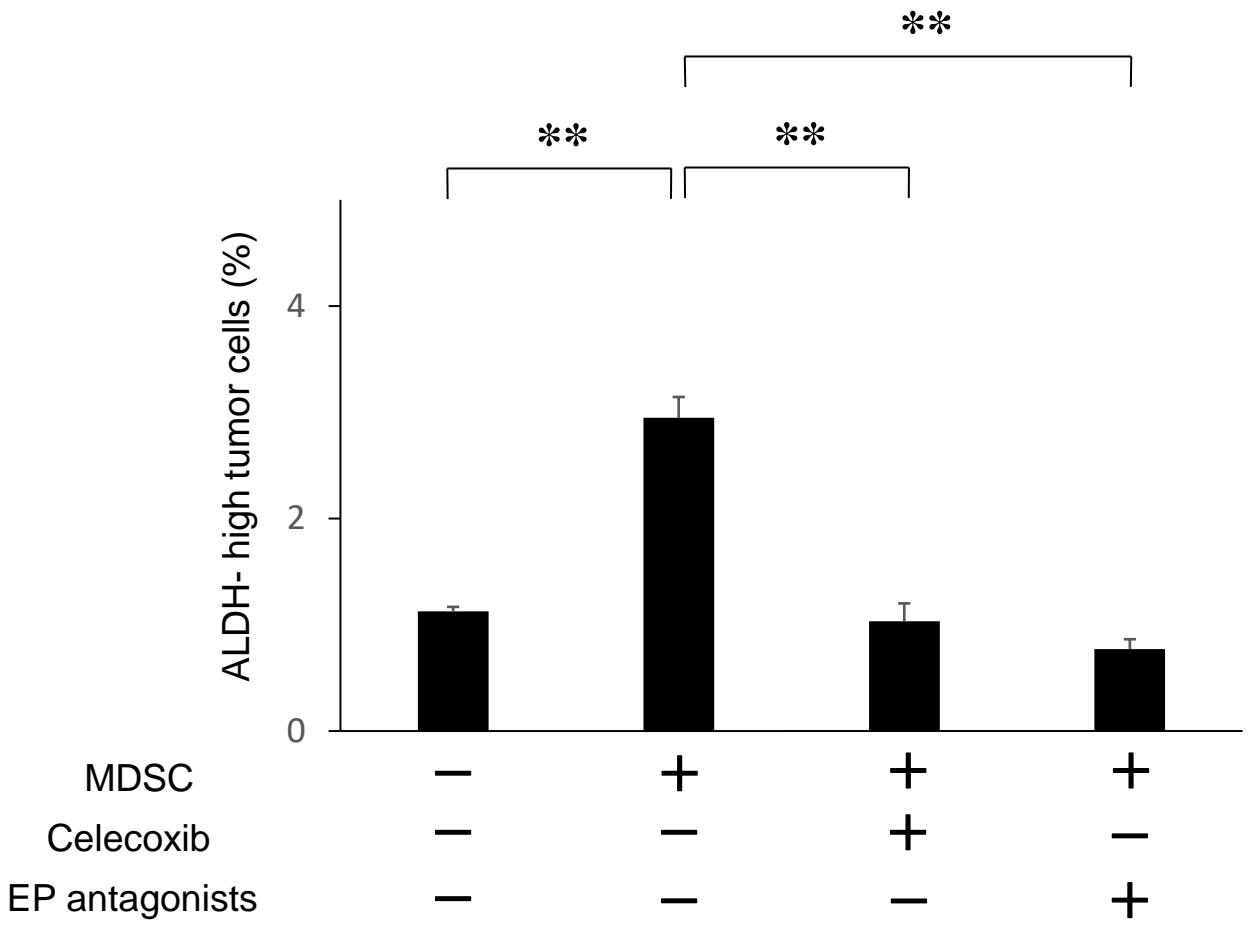

Supplementary Fig. 4

a

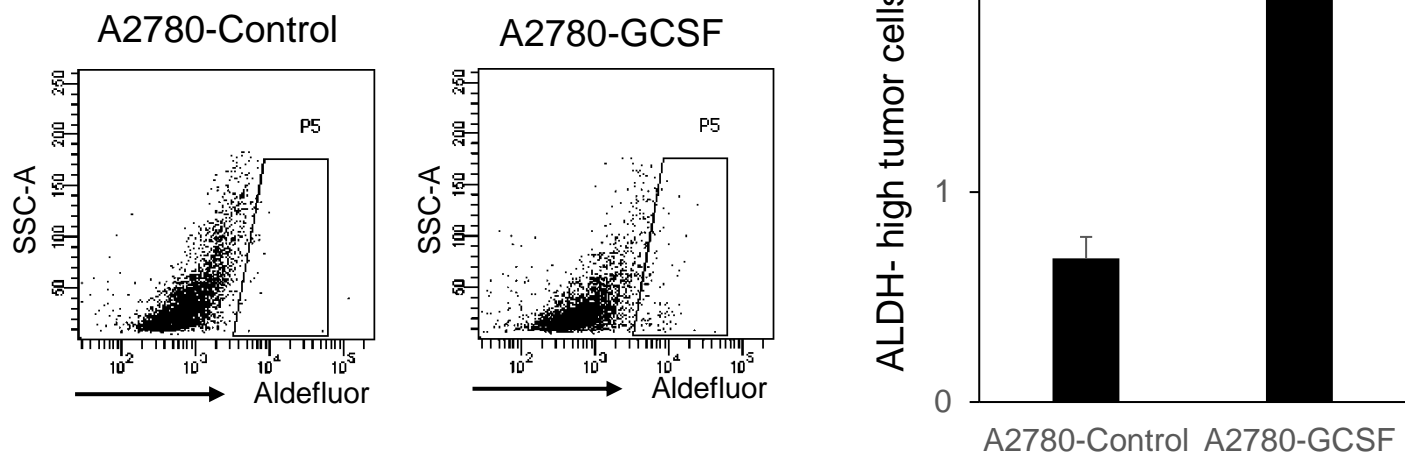

b

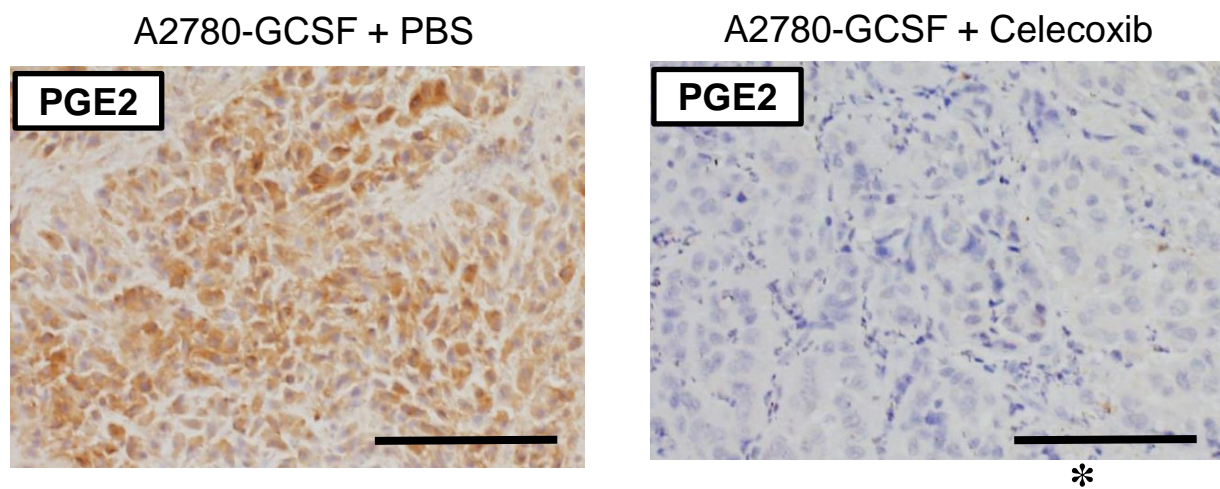

c

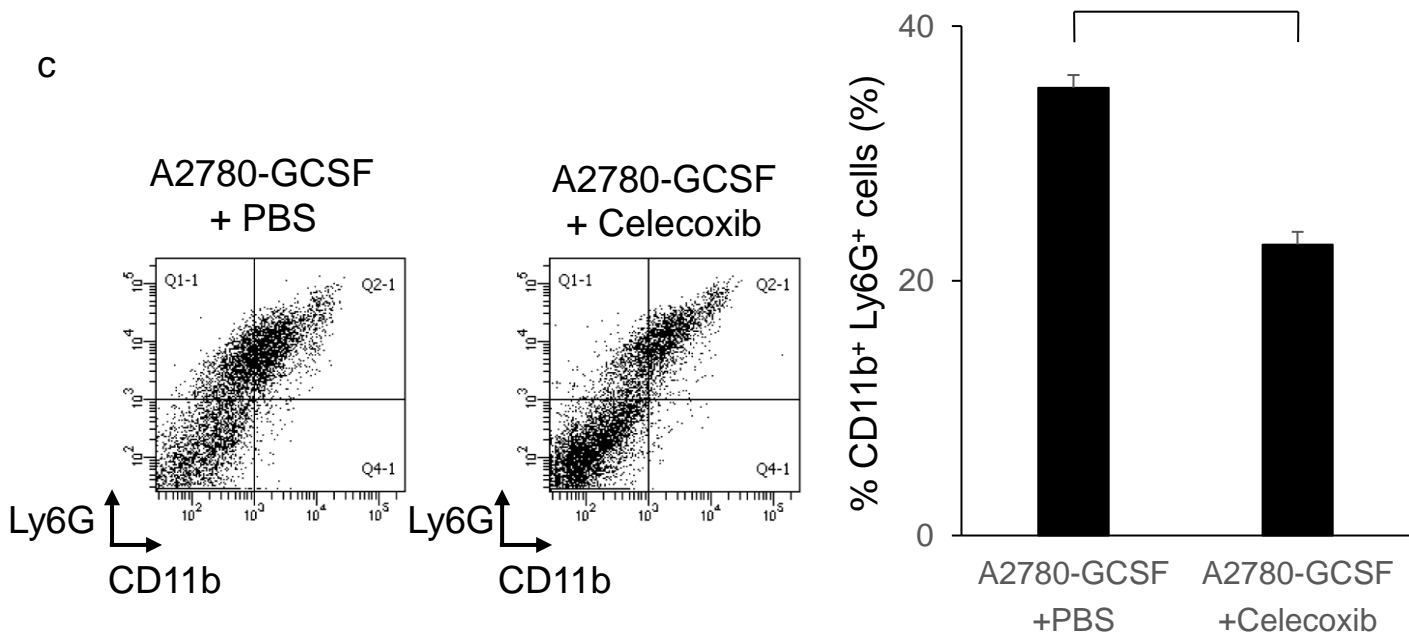



d

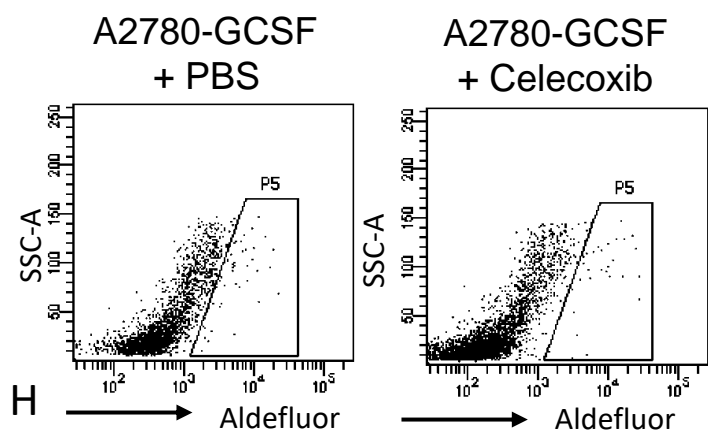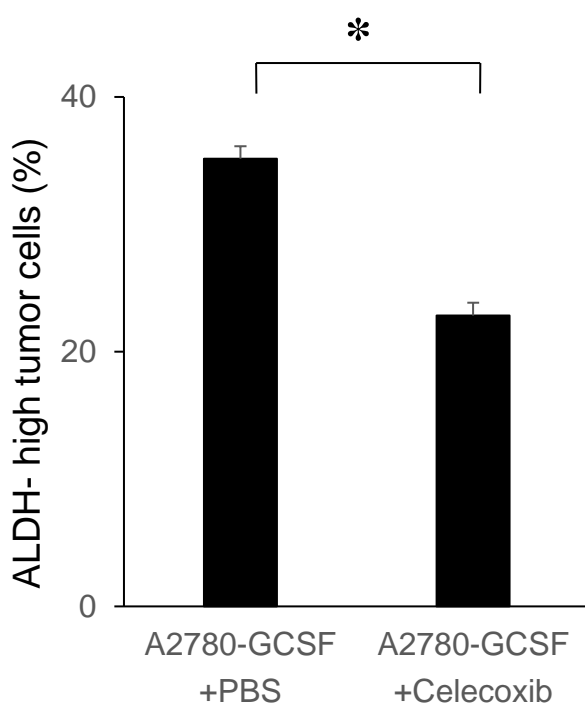

e

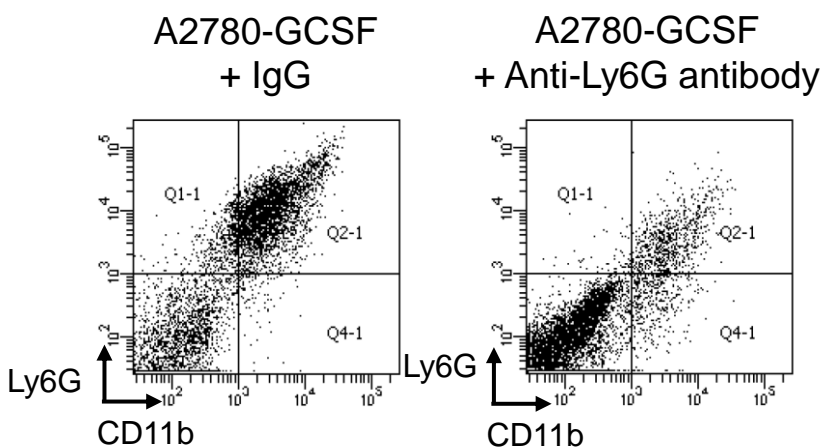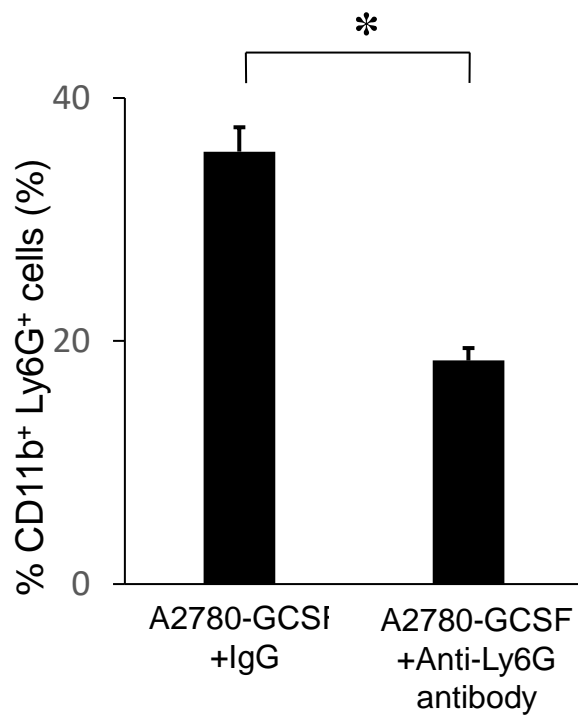

f

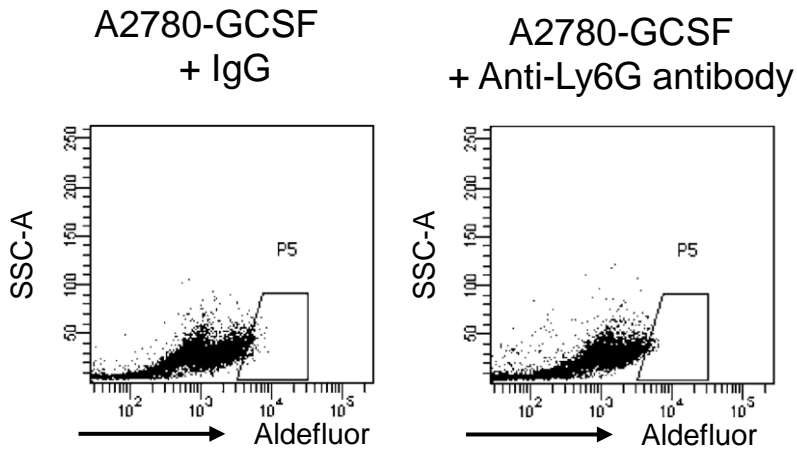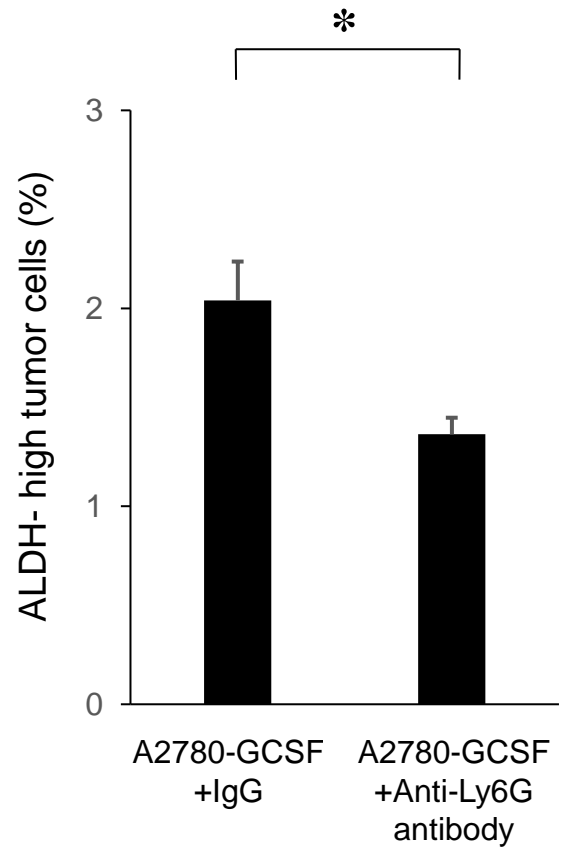

Supplementary Fig. 5

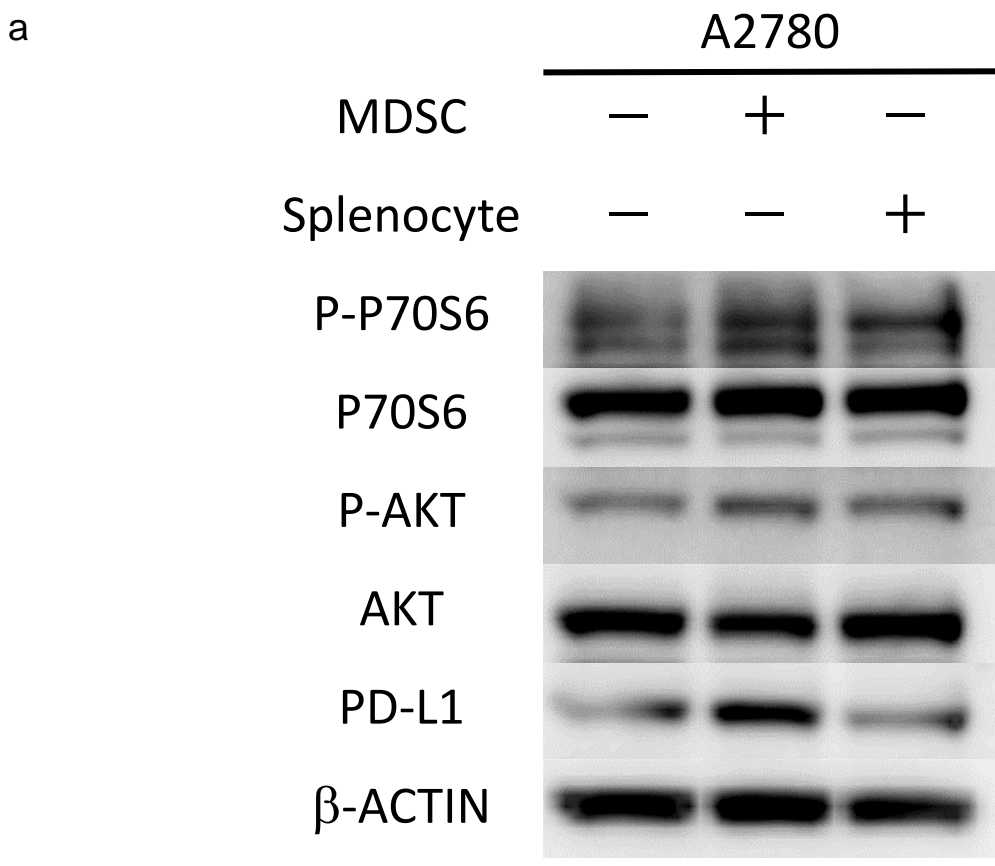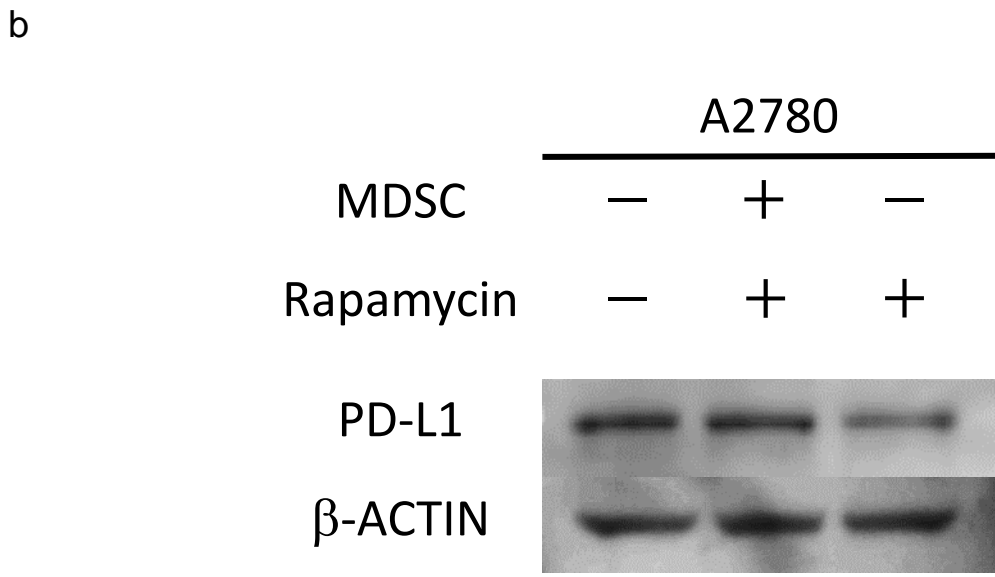

c

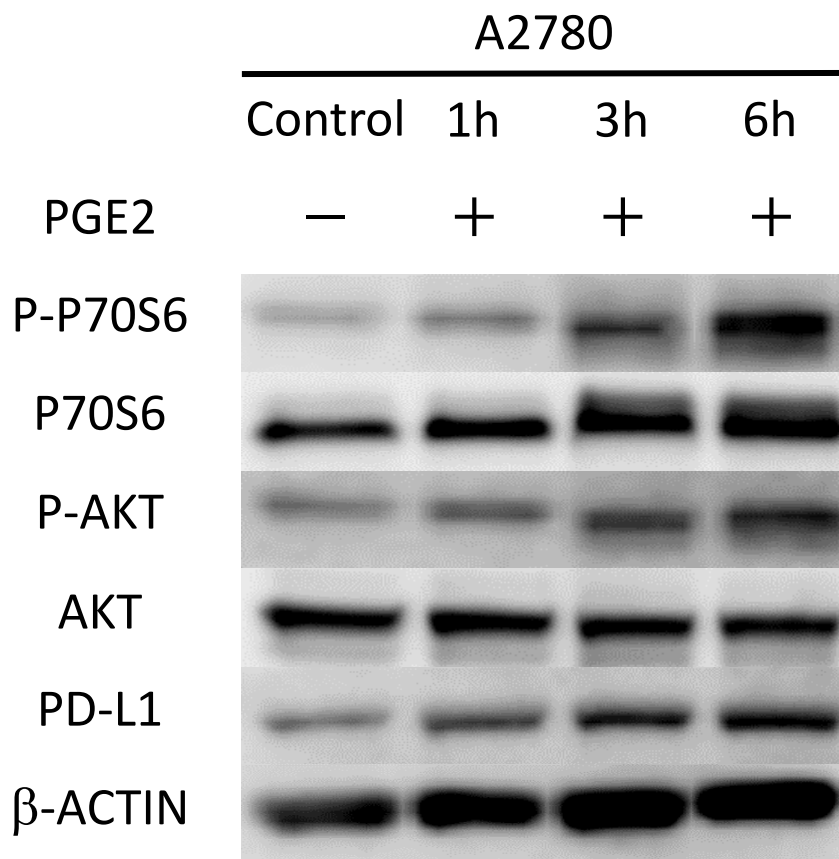

d

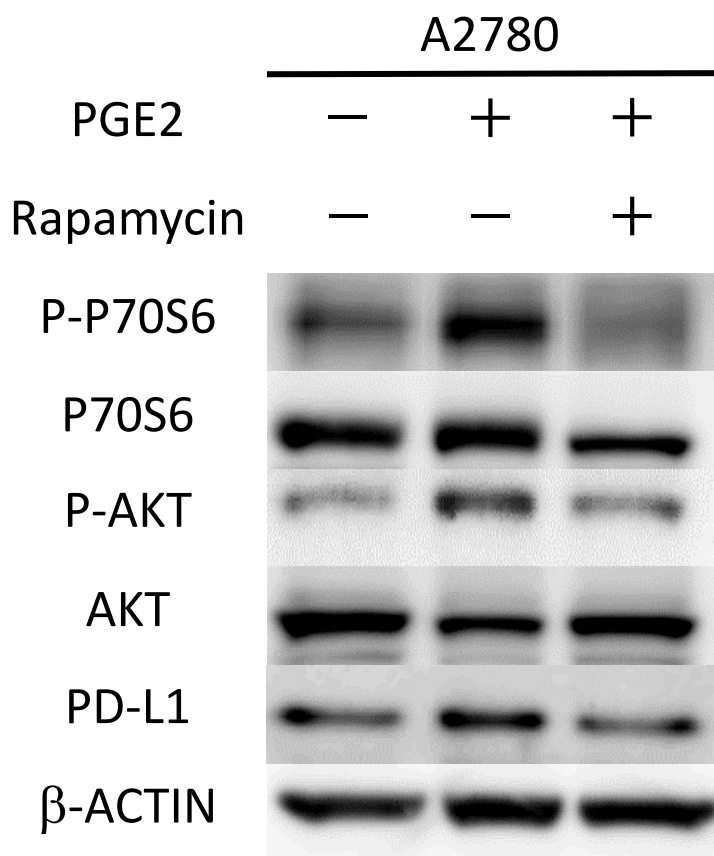

Supplement: 262_2020_2628_MOESM1_ESM.pdf [file 262_2020_2628_MOESM1_ESM.pdf]
