# Supplementary material
Source: PubMed Central journal article supplement (PMC11027471)
Supplement: 262_2020_2628_MOESM3_ESM.pdf [file 262_2020_2628_MOESM3_ESM.pdf]

Supplementary Table 1. The list of the primer sequences used as PCR and qRT-PCR.

|         | Primer               | Forward primer                 | Reverse primer                 |
|---------|----------------------|--------------------------------|--------------------------------|
| PCR     | Mouse <i>Gapdh</i>   | 5'-TTAGCCCCCTGGCCAAGG-3'       | 5'-CTTACTCCTTGGAGGCCATG-3'     |
|         | Mouse <i>G-CSF</i>   | 5'-GTTGGCAACATCCAGCTGAAGCAA-3' | 5'-TTCCTGCTTAAGTCCCTGGAGCAA-3' |
|         | mouse <i>Ep2</i>     | 5'-CAGGAGAGGAGAGAGGACTT-3'     | 5'-GAAGTCCGACAACAGAGGAC-3'     |
|         | mouse <i>Ep4</i>     | 5'-GTTGGTGGATGAGGTTAGTG -3'    | 5'-CTAGTGGGAGTCCAGATGAA -3'    |
|         | human $\beta$ -actin | 5'-CGTGACATTAAGGAGAAGCTGTG-3'  | 5'-GCTCAGGAGGAGCAATGATCTTGA-3' |
|         | human G-CSF          | 5'-TGAGTGTGCCACCTACAAGC-3'     | 5'-GACACCTCCAGGAAGCTCTG-3'     |
|         | human EP2            | 5'-TTCATCCGGCACGGGCGGACCGC-3'  | 5'-GTCAGCCTGTTTACTGGCATCTG-3'  |
|         | human EP4            | 5'-CCTCCTGAGAAAGACAGTGCT-3'    | 5'-AAGACACTCTCTGAGTCCT-3'      |
| qRT-PCR | human GAPDH          | 5'-CATGAGAAGTATGACAACAGCCT-3'  | 5'-AGTCCTTCCACGATACCAAAGT-3'   |
|         | human PD-L1          | 5'-TCAATGCCCATACAACAAA-3'      | 5'-GCTTGTCCAGATGACTTCG-3'      |

Supplementary Table 2. Antibodies list of immunofluorescence staining.

| Figure No. | Primary antibodies    |                              |                           | Secondary antibodies             |                                     |                      | Detection                    |                                |           |
|------------|-----------------------|------------------------------|---------------------------|----------------------------------|-------------------------------------|----------------------|------------------------------|--------------------------------|-----------|
|            | Antibodies            | Manufacturer<br>(Cat#)       | Condition                 | Antibodies                       | Manufacturer<br>(Cat#)              | Condition            | Antibodies                   | Manufacturer<br>(Cat#)         | Condition |
| Figure 5c  | Anti-mouse<br>ALDH1A1 | Abcam<br>(#ab52492)          | 1:100,<br>4°C Over night  | Histofine Simple<br>Stain Max-PO | Nichirei<br>Bioscience<br>(#424144) | RT 30min             | TSA Cyanine3<br>System       | PerkinElmer<br>(#SAT704A001EA) | RT 10min  |
|            | Anti-mouse<br>PD-L1   | Proteintech<br>(#66248-1-Ig) | 1:2000,<br>4°C Over night | Anti-mouse<br>AlexaFluor 488     | Abcam<br>(#ab150105)                | RT 120min            | -                            | -                              | -         |
| Figure 5d  | Anti-mouse<br>Gr-1    | R&D systems<br>(# MAB1037)   | 1:200,<br>4°C Over night  | Biotinylated<br>IgG              | Anti-rat<br>Vector<br>(#BA4000)     | RT 30min<br>RT 10min | TSA<br>Fluorescein<br>System | PerkinElmer<br>(#SAT701001EA)  | RT 10min  |
|            | Anti-mouse<br>ALDH1A1 | Abcam<br>(#ab52492)          | 1:100,<br>4°C Over night  | Histofine Simple<br>Stain Max-PO | Nichirei<br>Bioscience<br>(#424144) | RT 30min             | TSA Cyanine3<br>System       | PerkinElmer<br>(#SAT704A001EA) | RT 10min  |

RT; Room temperature

Supplementary Table 3. Clinicopathological characteristics of the patients with or without leukocytosis.

|                                 |              | All patients<br>(N=340) | WBC $\geq$ 10000/ $\mu$ l<br>(n=24) | WBC <10000/ $\mu$ l<br>(n=316) |         |
|---------------------------------|--------------|-------------------------|-------------------------------------|--------------------------------|---------|
|                                 |              | n (%)                   | n (%)                               | n (%)                          | P-value |
| Age (years)                     | <50          | 112 (32.6)              | 12 (50.0)                           | 100 (31.7)                     | 0.0651  |
|                                 | $\geq$ 51    | 232 (67.4)              | 12 (50.0)                           | 216 (68.4)                     |         |
| FIGO stage                      | I- II        | 188 (55.3)              | 12 (50.)                            | 176 (55.7)                     | 0.5884  |
|                                 | III- IV      | 152 (44.7)              | 12 (50.0)                           | 140 (44.3)                     |         |
| Histology                       | Serous       | 131 (38.5)              | 7 (29.2)                            | 124 (39.2)                     | 0.0511  |
|                                 | Clear        | 82 (24.1)               | 2 (8.3)                             | 80 (25.3)                      |         |
|                                 | Endometrioid | 60 (17.7)               | 6 (25.0)                            | 54 (17.1)                      |         |
|                                 | Mucinous     | 31 (9.1)                | 3 (12.5)                            | 28 (8.9)                       |         |
|                                 | Others       | 36 (10.6)               | 6 (25.0)                            | 30 (9.5)                       |         |
| LN metastasis                   | Negative     | 250 (73.5)              | 18 (75.0)                           | 232 (73.4)                     | 0.8655  |
|                                 | Positive     | 90 (26.5)               | 6 (25.0)                            | 84 (26.6)                      |         |
| Peritoneal washing <sup>1</sup> | Negative     | 147 (44.4)              | 11 (45.8)                           | 136 (44.3)                     | 0.8842  |
|                                 | Positive     | 184 (55.6)              | 13 (54.2)                           | 171 (55.7)                     |         |
| Optimal surgery <sup>2</sup>    | Yes          | 264 (80.5)              | 14 (70.0)                           | 250 (81.2)                     | 0.2220  |
|                                 | No           | 64 (19.5)               | 6 (30.0)                            | 58 (18.8)                      |         |
| CA125 (U/ml)                    | <500         | 216 (63.5)              | 11 (45.8)                           | 205 (64.9)                     | 0.0617  |
|                                 | $\geq$ 500   | 124 (36.5)              | 13 (54.2)                           | 111 (35.1)                     |         |

WBC; white blood cell, FIGO; The International Federation of Gynecology and Obstetrics, LN; lymphocyte node, CA125; carbohydrate antigen 125

<sup>1</sup> Peritoneal washing was not indicated for 9 cases.

<sup>2</sup> Surgery was performed in 328 cases.
